# Supplementary figures and images for: Localization and Regulation of the N Terminal Splice Variant of PGC-1αin Adult Skeletal Muscle Fibers
Source: Hindawi journal article supplement (doi:10.1155/2012/989263), 2012-01-01

## Supplementary Figure 1

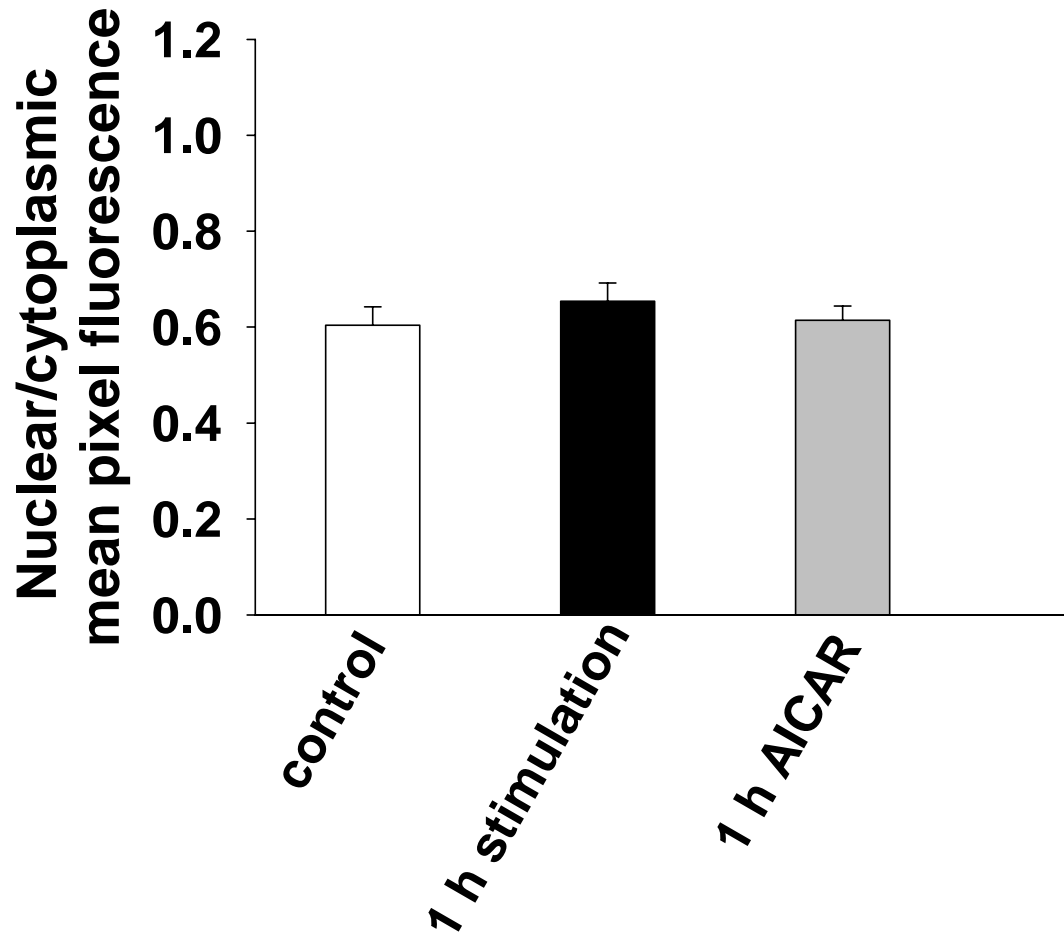

Supplement: f1 [file 989263.f1.pdf]
